# Supplementary material for: Anionic polymer coating for enhanced delivery of Cas9 mRNA and sgRNA nanoplexes
Source: Royal Society of Chemistry journal article supplement (doi:10.1039/d4bm01290a), 2024-12-11
Supplement: d4bm01290a1.pdf [file d4bm01290a1.pdf]

## Supplementary Information

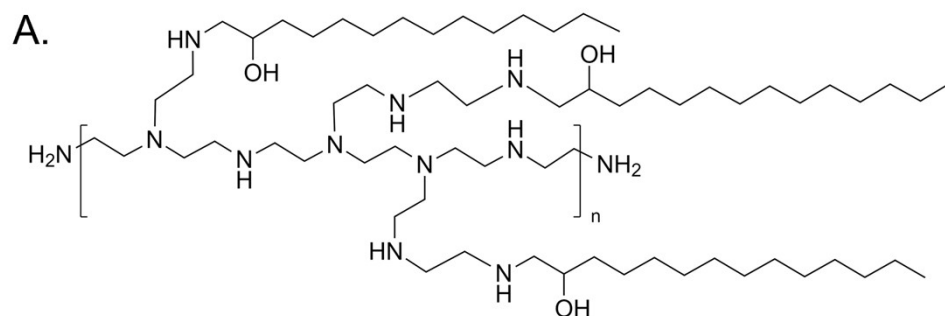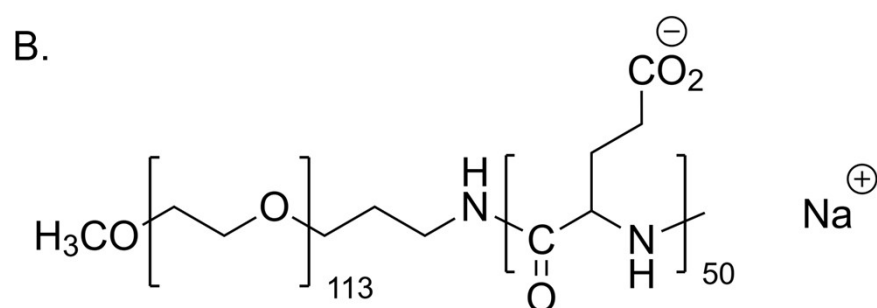

Figure S1. A. the chemical structures of C14-PEI; and B. PEG-PLA.

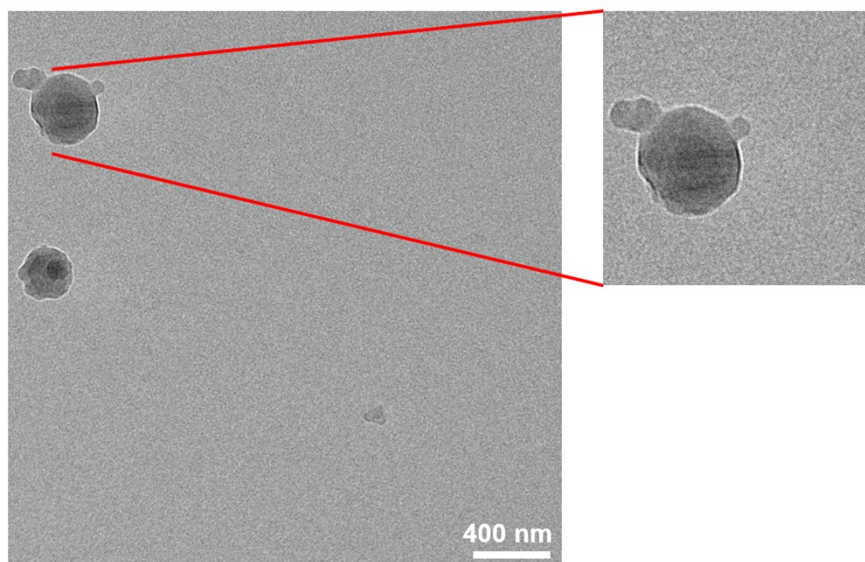

Figure S2. Cryo-EM image of C14-PEI nanoparticles.

| Uncovered Area (Pixels) | 0h      |         |         | 4h      |        |        | 8h     |        |        | 24h    |        |
|-------------------------|---------|---------|---------|---------|--------|--------|--------|--------|--------|--------|--------|
| Blank                   | 1312919 | 1309065 | 1301590 | 918533  | 857203 | 903438 | 598260 | 642215 | 466384 | 0      | 0      |
| C14-PEI                 | 1273331 | 1278102 | 1261105 | 822393  | 834535 | 816370 | 576807 | 553308 | 557377 | 0      | 4892   |
| PEG-PLA/C14-PEI w/w 0.2 | 1467265 | 1165410 | 1168270 | 1162051 | 909283 | 930458 | 944096 | 761768 | 803898 | 251631 | 293141 |
| PEG-PLA/C14-PEI w/w 0.5 | 1135381 | 1170014 | 1116487 | 917249  | 899919 | 875391 | 794744 | 701866 | 708277 | 65434  | 27251  |

Table S1. The uncovered area in cell migration tests.
